# Supplementary material
Source: ML conference proceedings conference paper supplement (https://openreview.net/forum?id=LvgOm9Rmih)
Supplement: supplementary_material [file attachment]

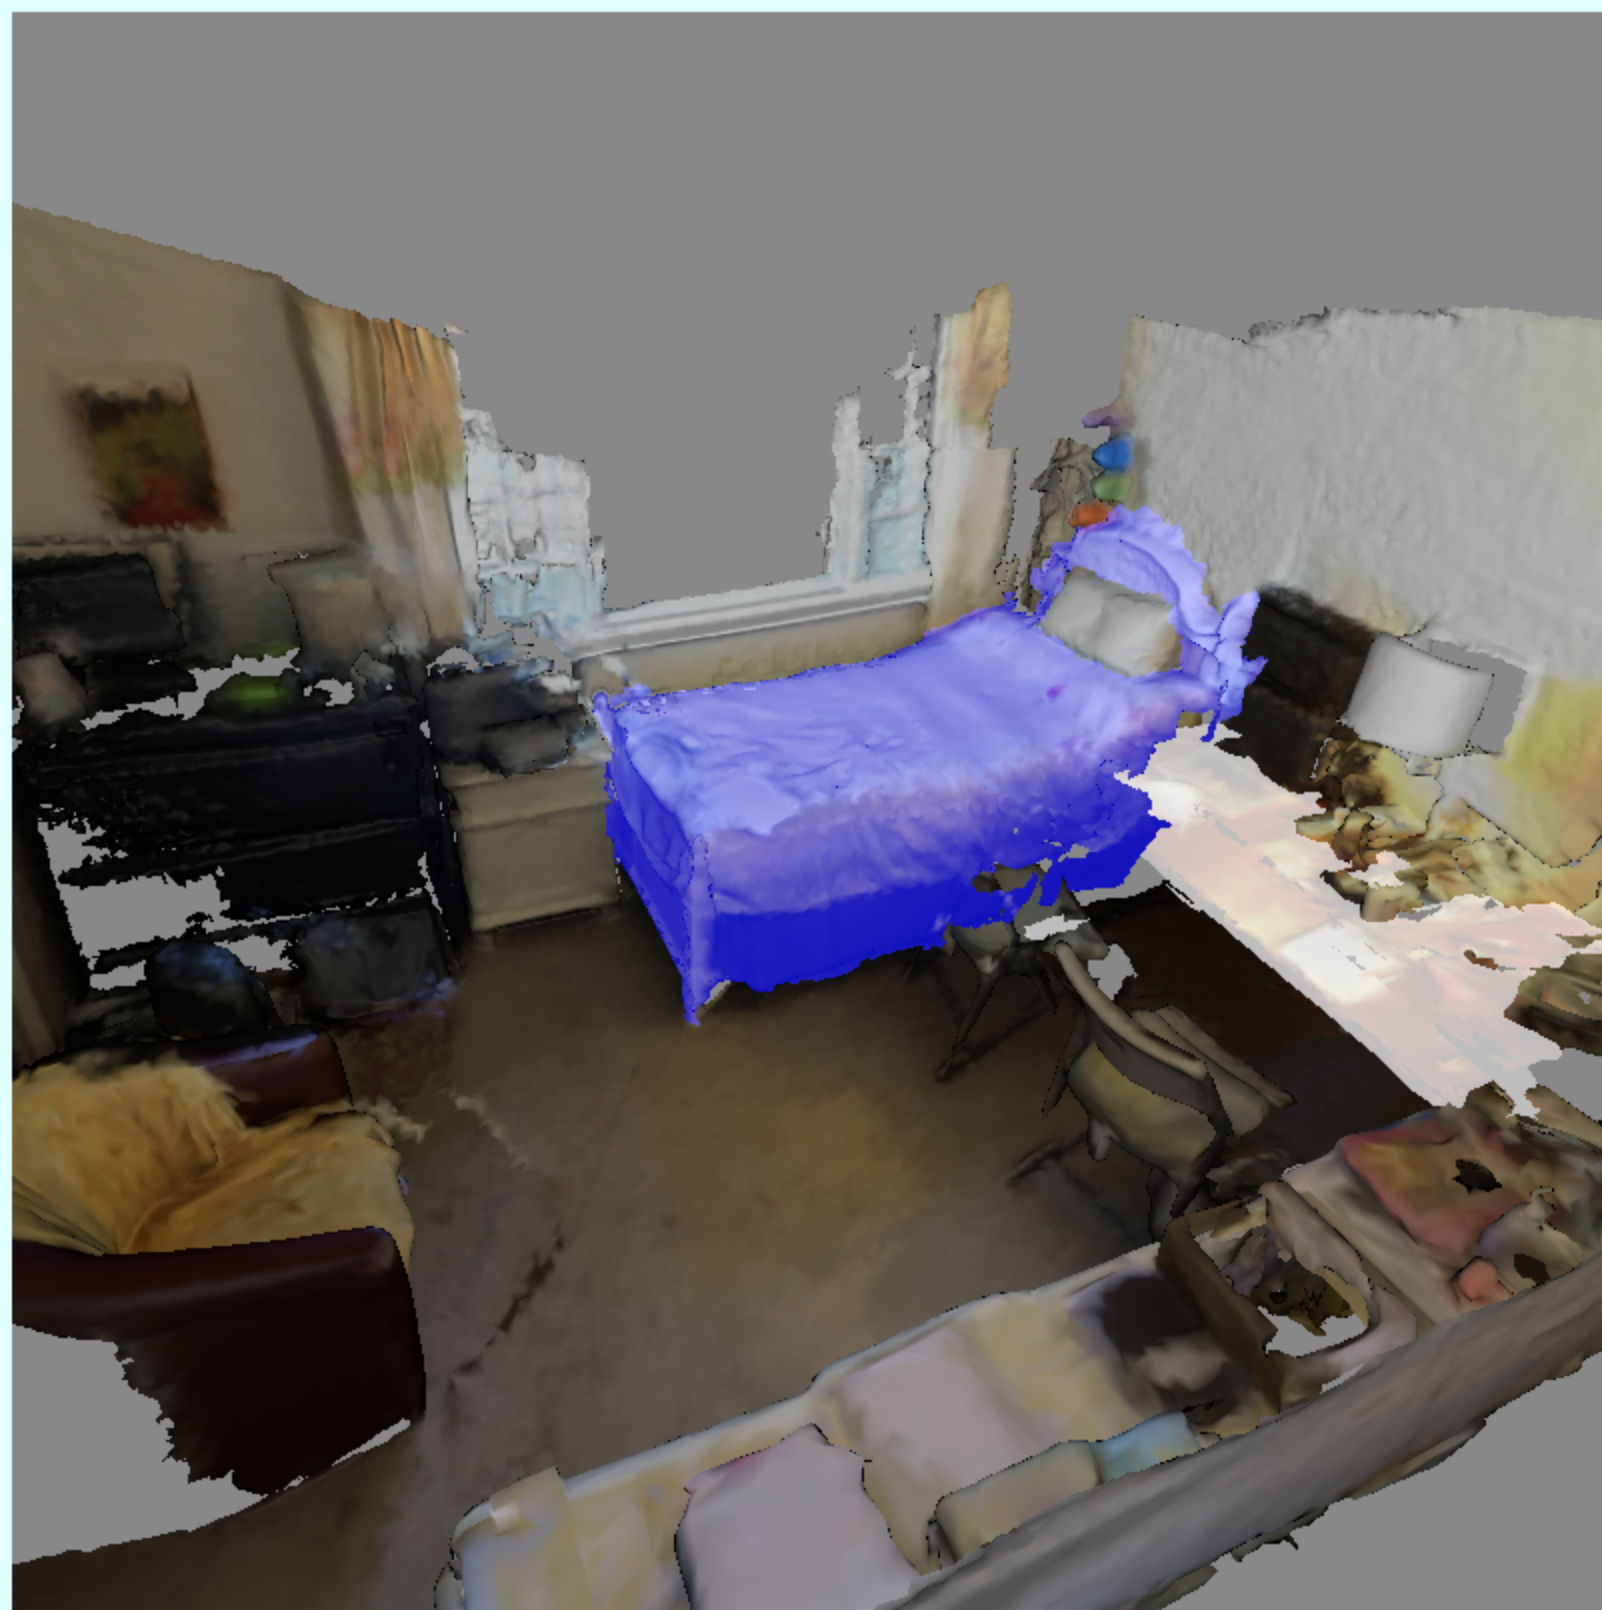

## Prepare for bedtime reading.

1. Walk to the bed adjacent to the nightstand.

2. Sit on the edge of the bed.

3. Reach for the red book inside the shelf close to the table.

4. Walk back to the bed.

5. Place the book beside you on the bed.

6. Turn on the lamp resting on the nearby table for better lighting.

Submit

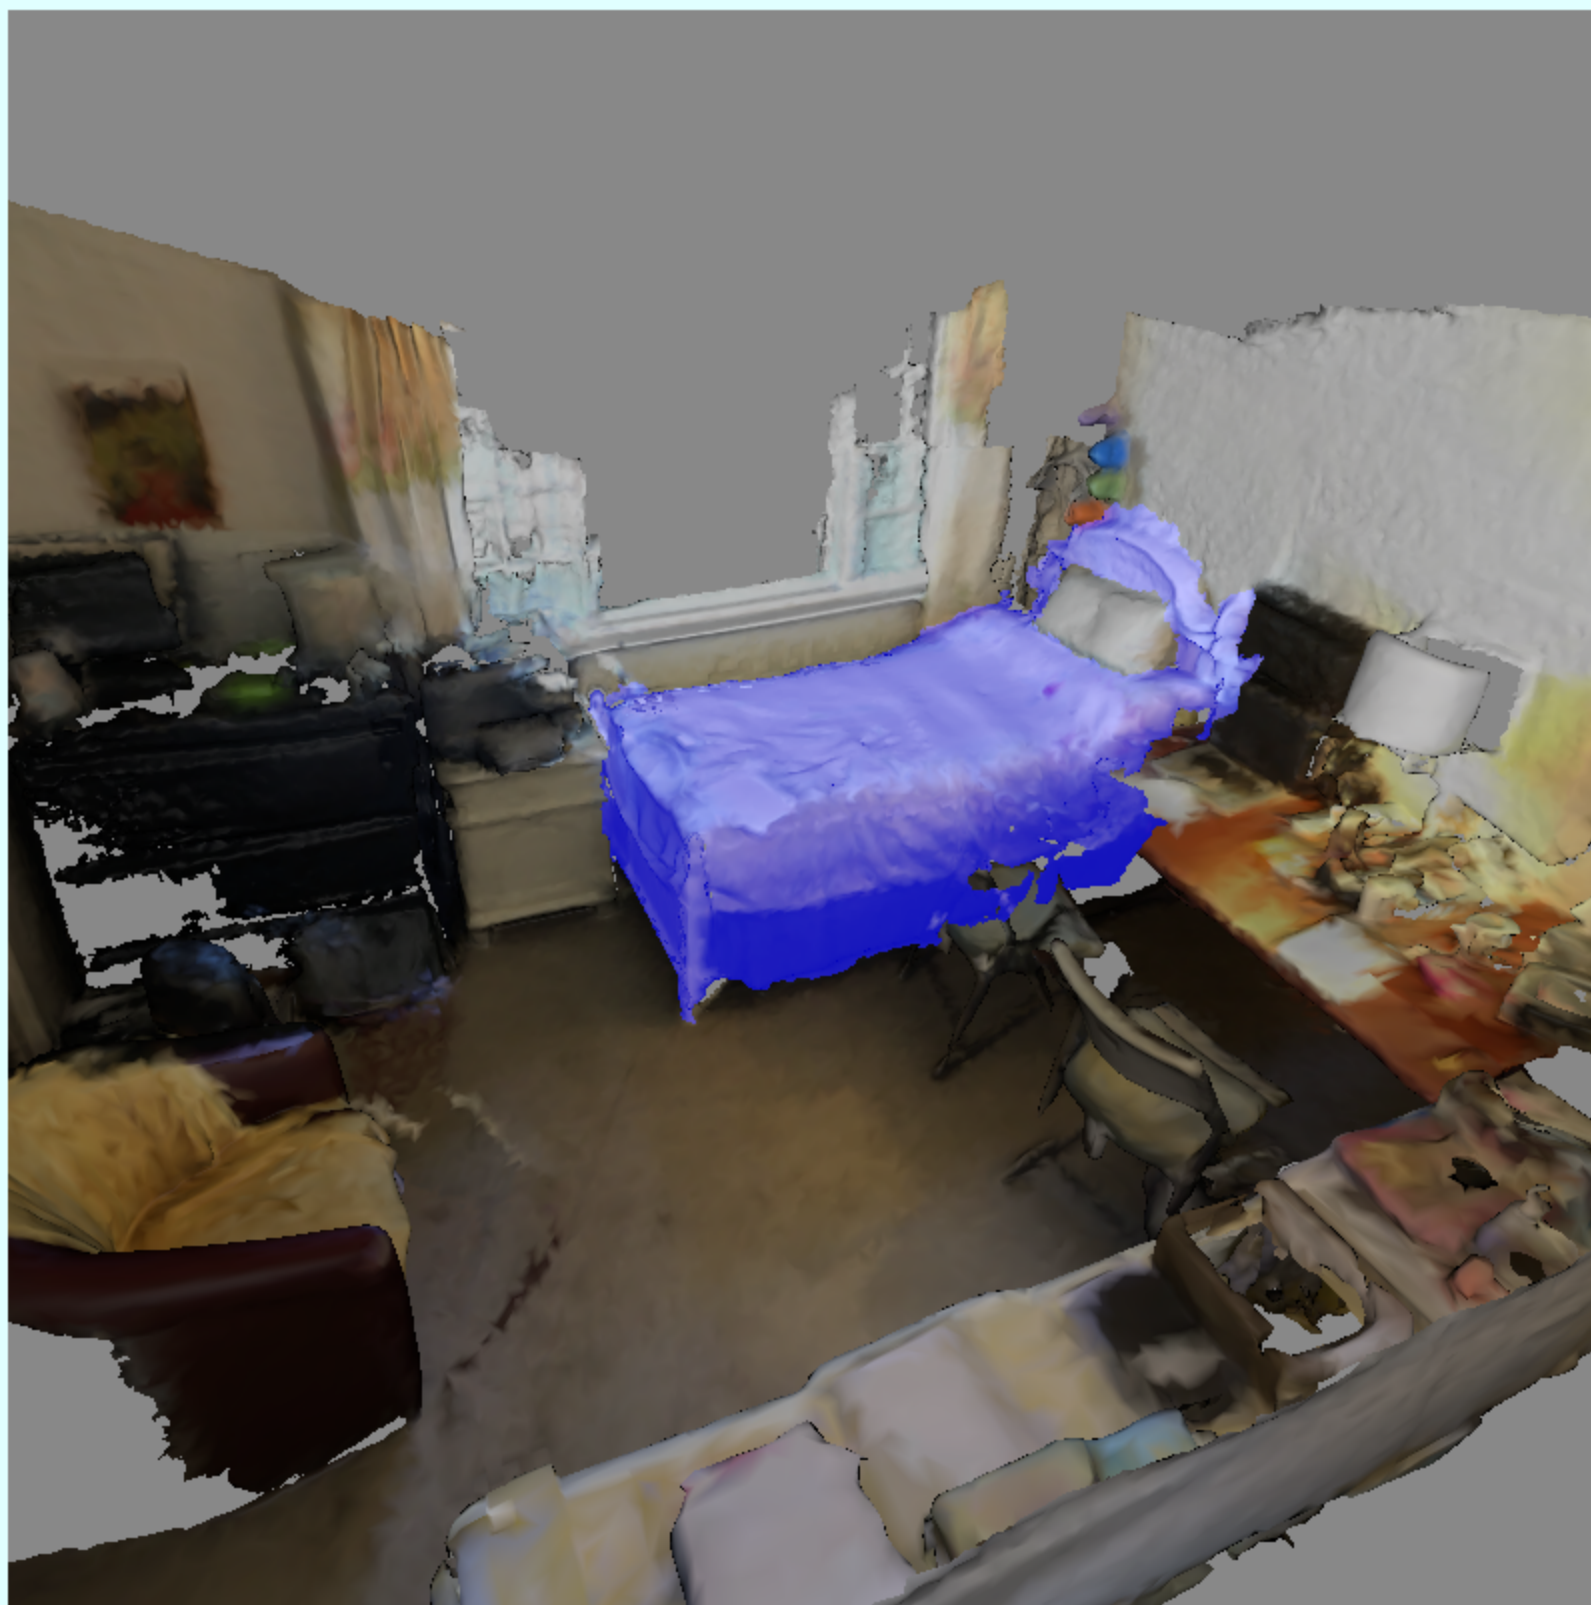

## Prepare for bedtime reading.

1. Walk to the bed adjacent to the nightstand.
2. Sit on the edge of the bed.
3. Reach for the red book inside the shelf close to the table.
4. Walk back to the bed.
5. Place the book beside you on the bed.
6. Turn on the lamp resting on the nearby table for better lighting.

Submit



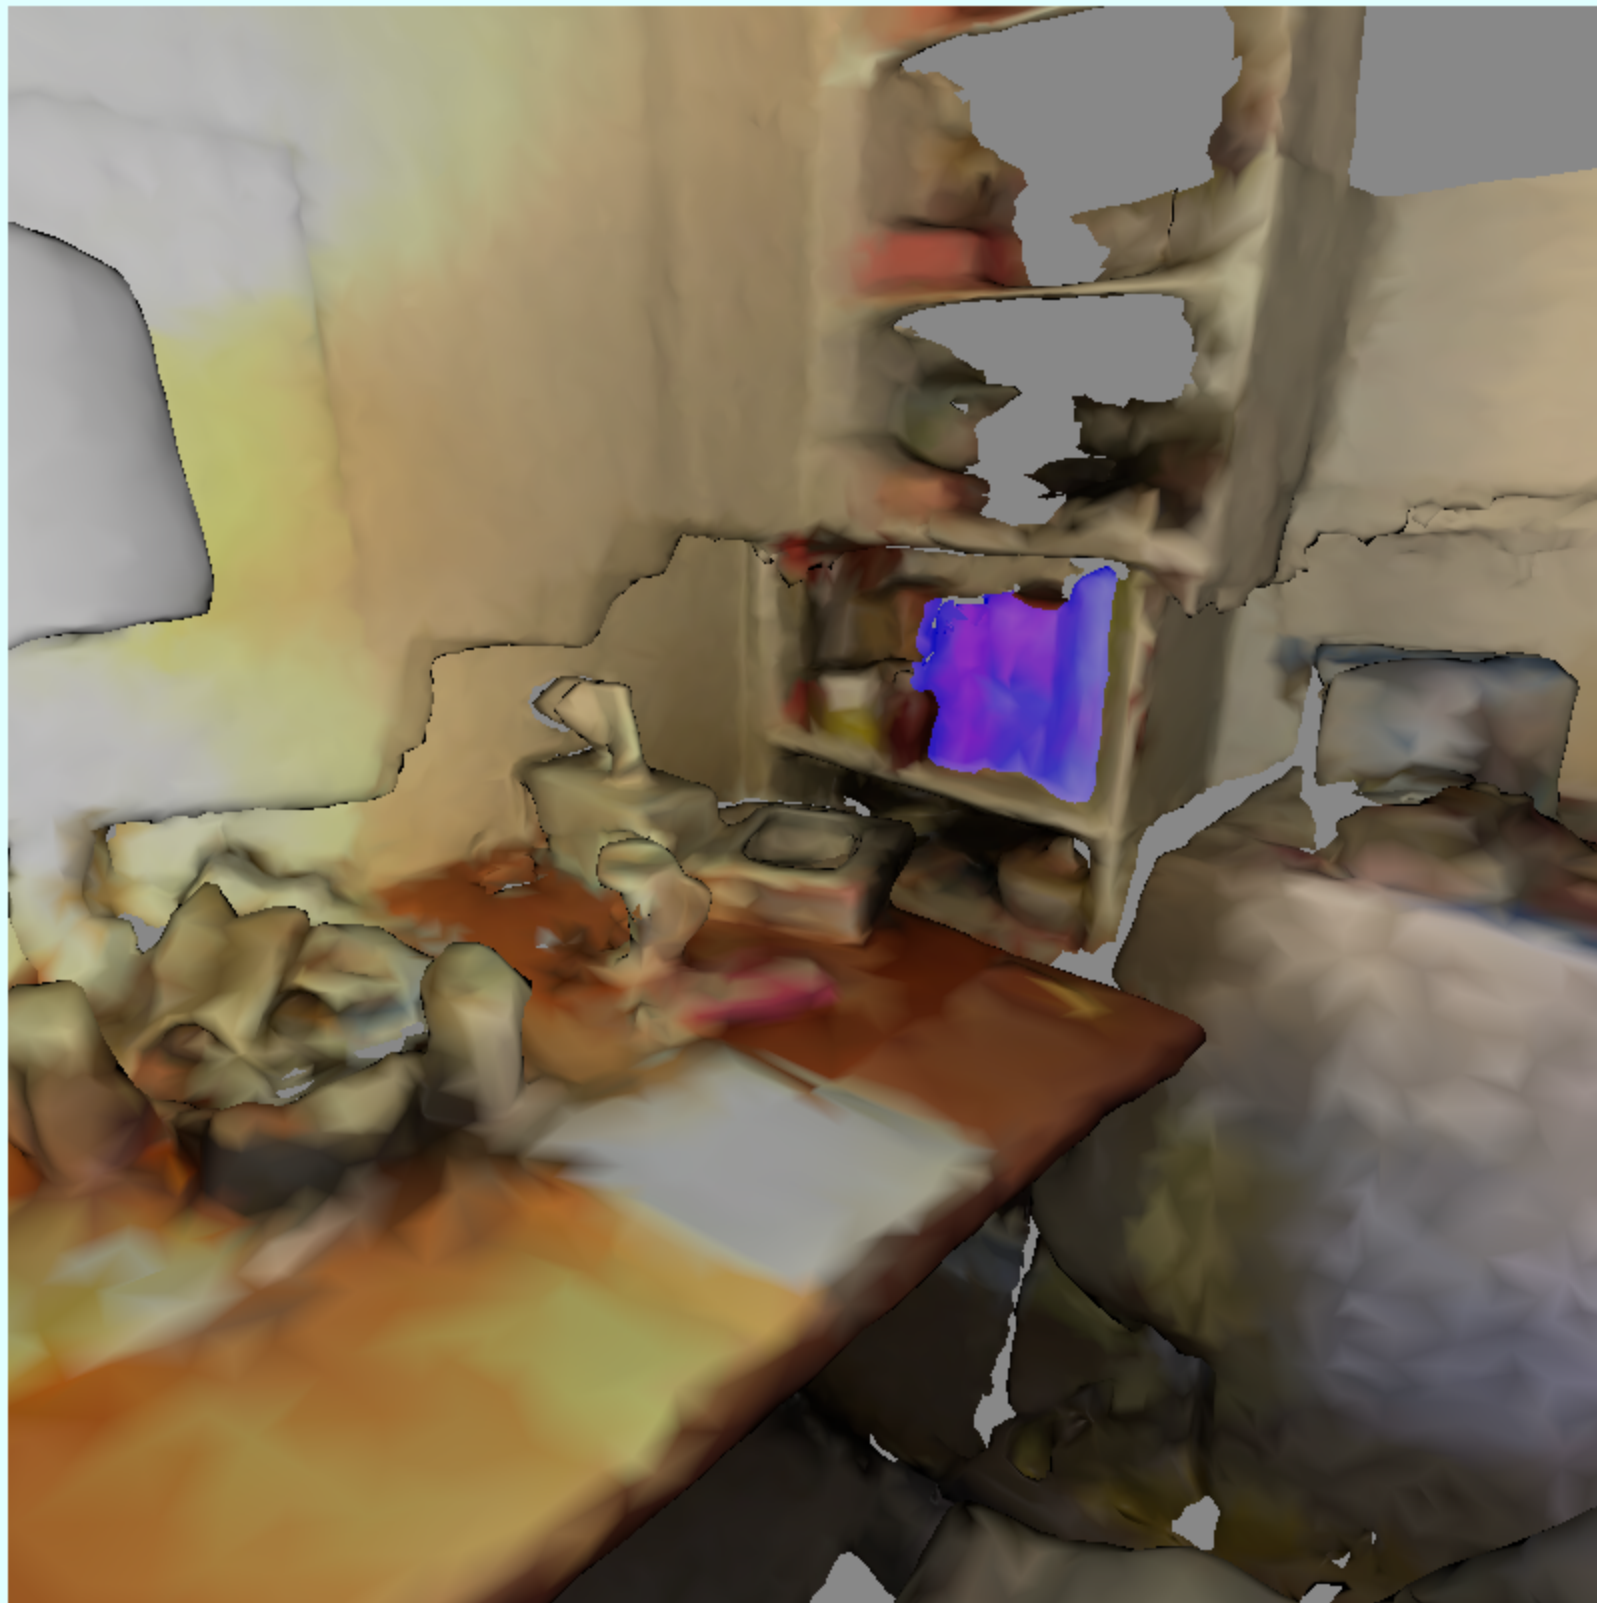

## Prepare for bedtime reading.

1. Walk to the bed adjacent to the nightstand.
2. Sit on the edge of the bed.
3. **Reach for the red book inside the shelf close to the table.**
4. Walk back to the bed.
5. Place the book beside you on the bed.
6. Turn on the lamp resting on the nearby table for better lighting.

Submit

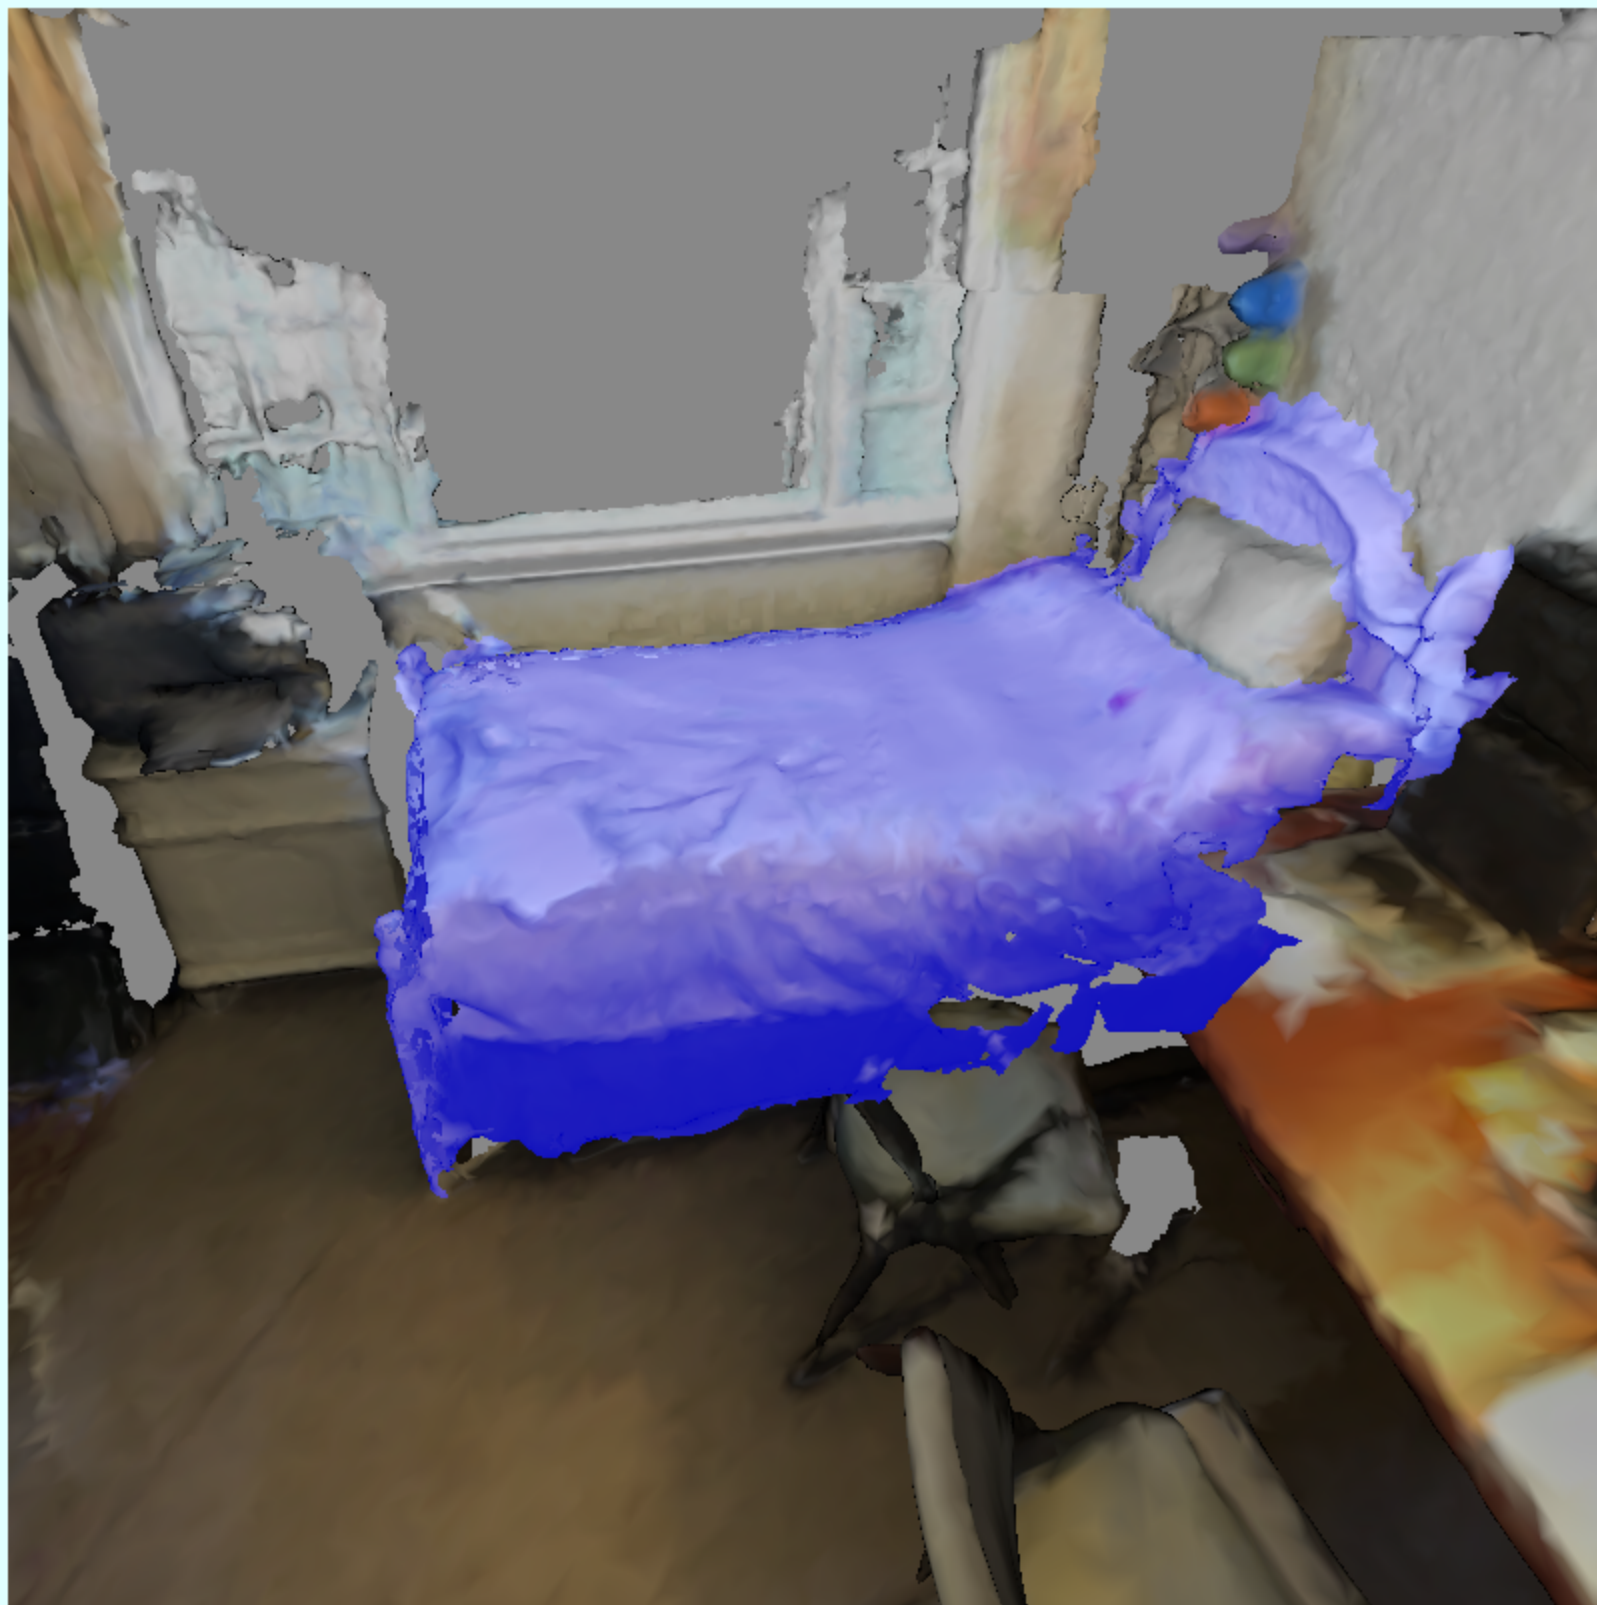

## Prepare for bedtime reading.

1. Walk to the bed adjacent to the nightstand.
2. Sit on the edge of the bed.
3. Reach for the red book inside the shelf close to the table.
- 4. Walk back to the bed.**
5. Place the book beside you on the bed.
6. Turn on the lamp resting on the nearby table for better lighting.

Submit

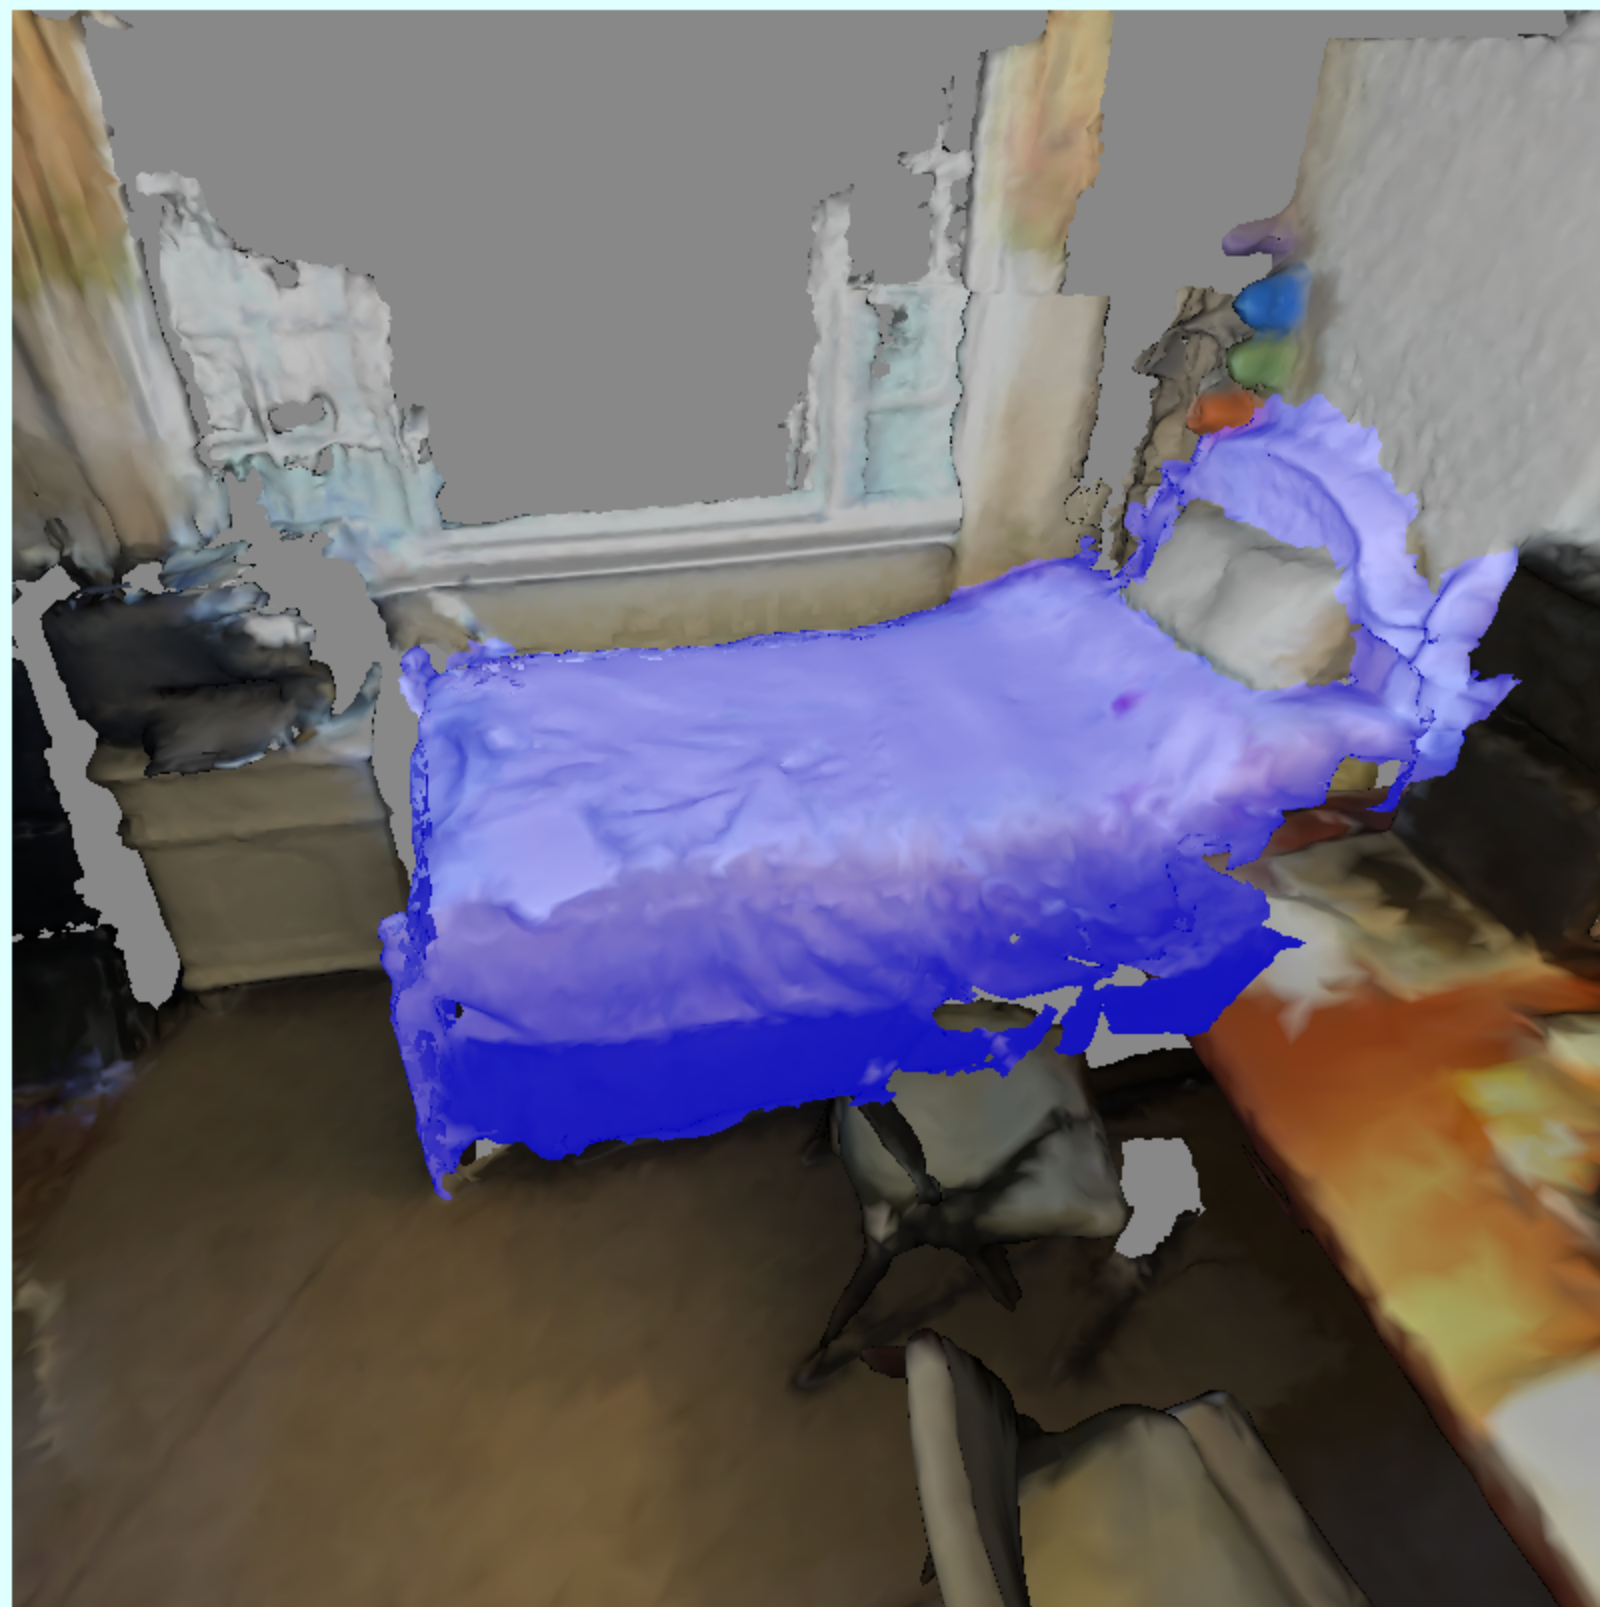

## Prepare for bedtime reading.

1. Walk to the bed adjacent to the nightstand.
2. Sit on the edge of the bed.
3. Reach for the red book inside the shelf close to the table.
4. Walk back to the bed.
- 5. Place the book beside you on the bed.**
6. Turn on the lamp resting on the nearby table for better lighting.

Submit



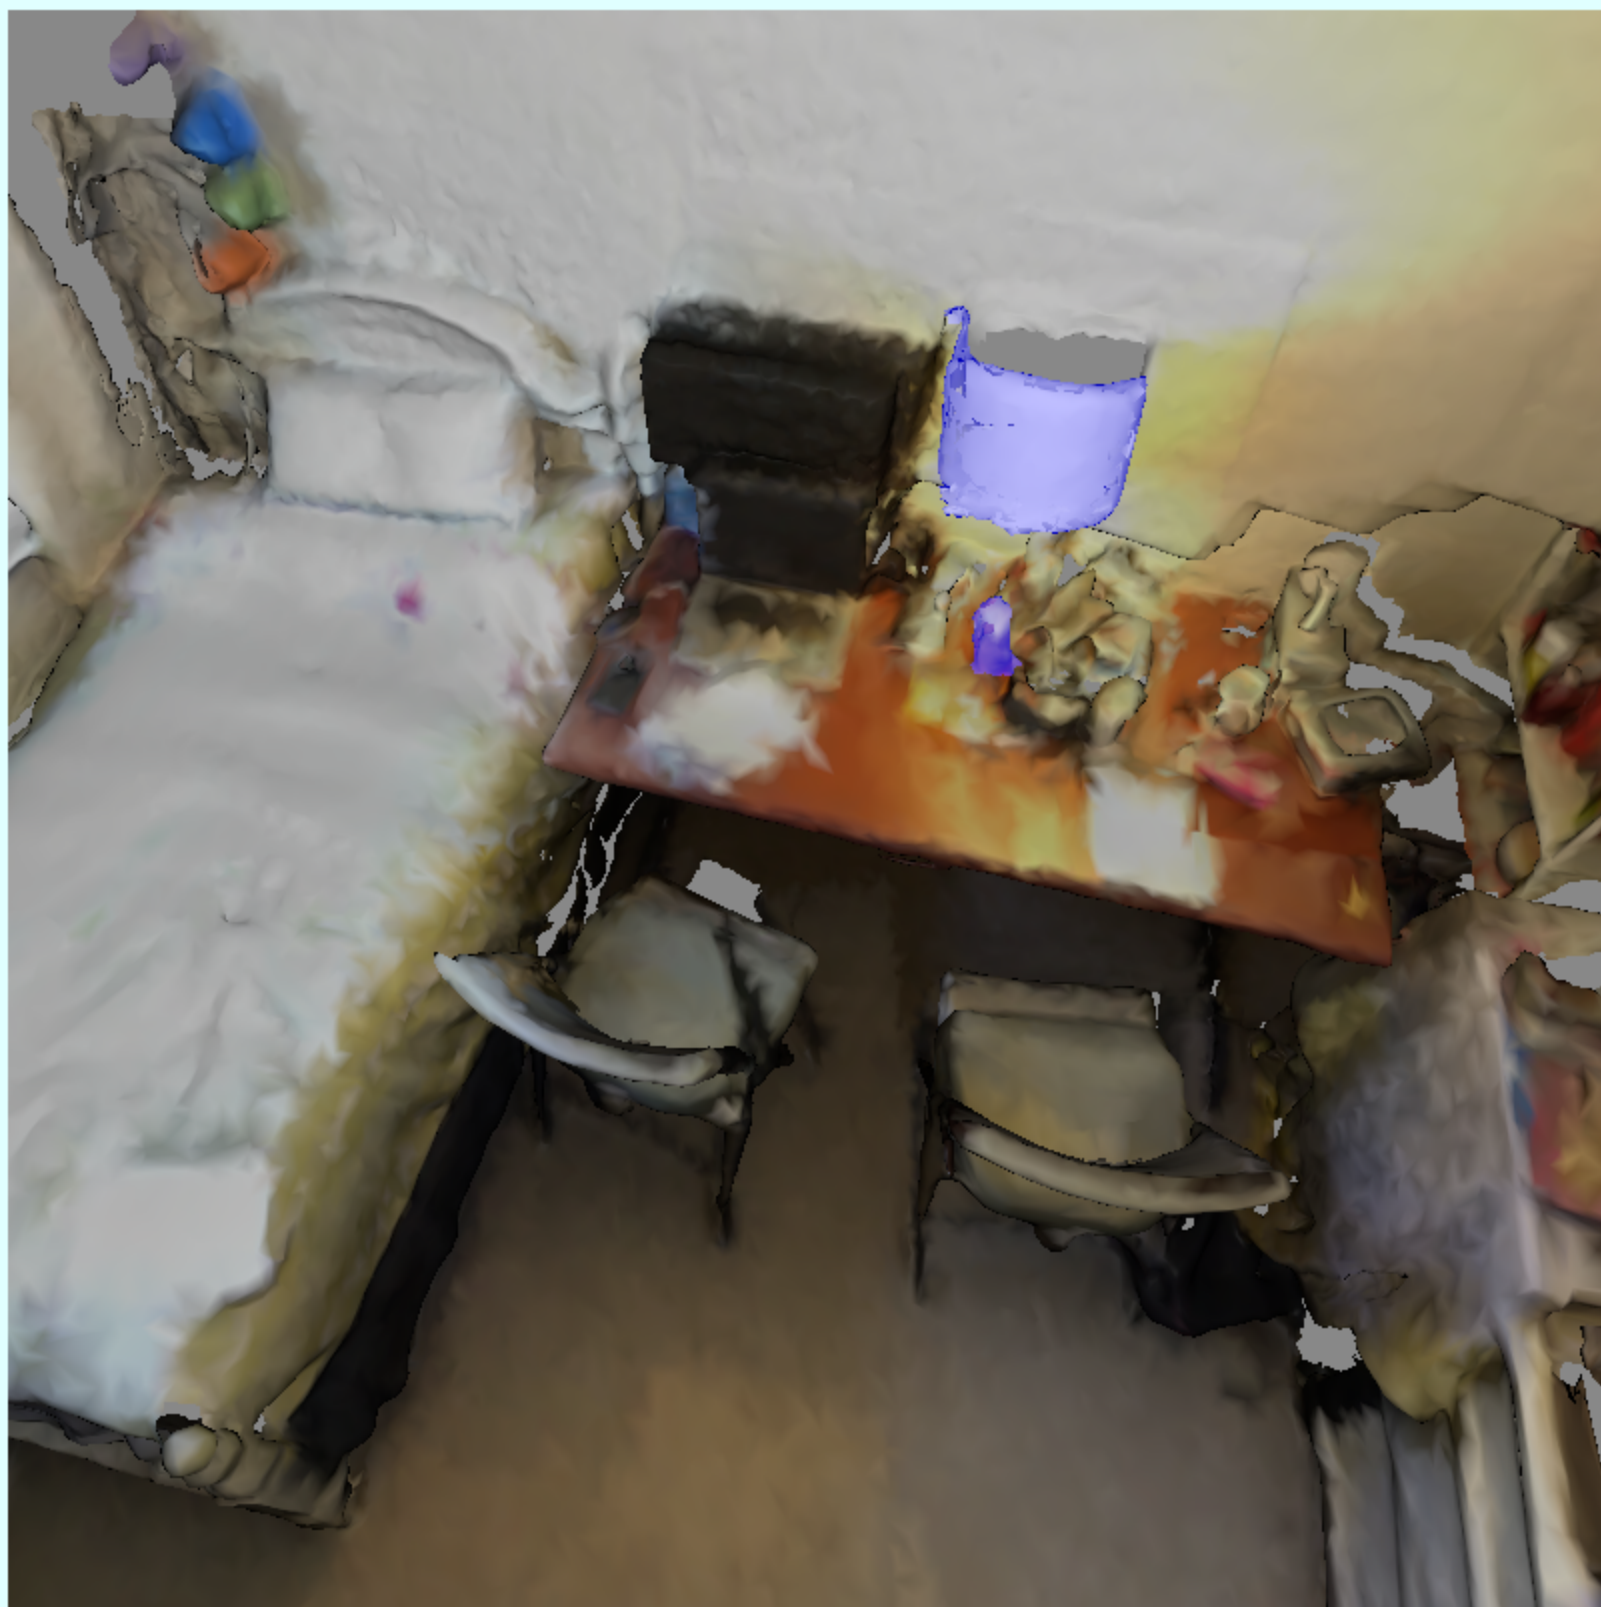

## Prepare for bedtime reading.

1. Walk to the bed adjacent to the nightstand.
2. Sit on the edge of the bed.
3. Reach for the red book inside the shelf close to the table.
4. Walk back to the bed.
5. Place the book beside you on the bed.
6. **Turn on the lamp resting on the nearby table for better lighting.**

Submit
